# Supplementary material for: V-doped porous CoP nanoarrays grown on carbon cloth with optimized electronic structure for the hydrogen evolution reaction
Source: Royal Society of Chemistry journal article supplement (doi:10.1039/d3na00348e), 2023-01-01
Supplement: d3na00348e1.pdf [file d3na00348e1.pdf]

V-Doped porous CoP nanoarrays grown on carbon cloth with optimized  
electronic structure for the hydrogen evolution reaction

Wenzhi Jia <sup>a#</sup>, Qian Lu <sup>a#</sup>, Wenjun Zheng <sup>a</sup>, Kunyan Wang <sup>a</sup>, Xinhua Liu <sup>b</sup>, Shichun  
Yang <sup>b</sup>, Bin He <sup>a\*</sup>

<sup>a</sup> Department of Materials Engineering, Huzhou University, Huzhou 313000, China

<sup>b</sup> School of transportation Science and Engineering, Beihang University, Beijing,  
100191, China

Corresponding author.

<sup>#</sup> These authors contributed equally to this work.

<sup>\*</sup> E-mail address: binhe@zjhu.edu.cn (B. He)

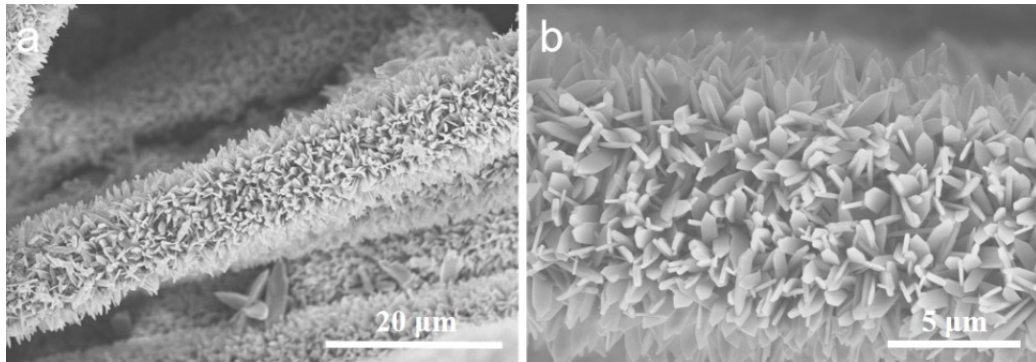

Figure S1 SEM images of Co-MOF (a, b).

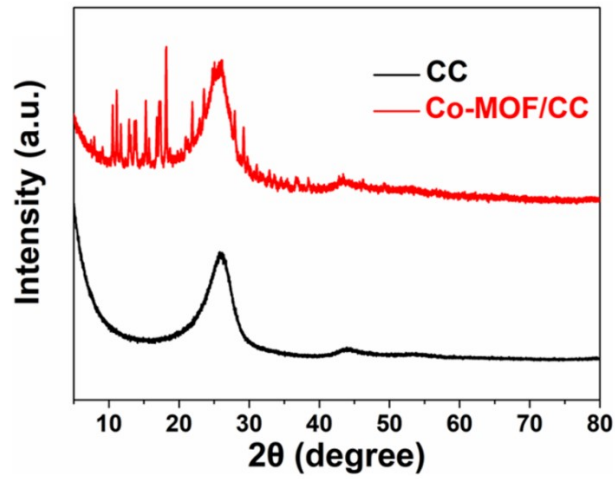

Figure S2 XRD patterns of Co-MOF.

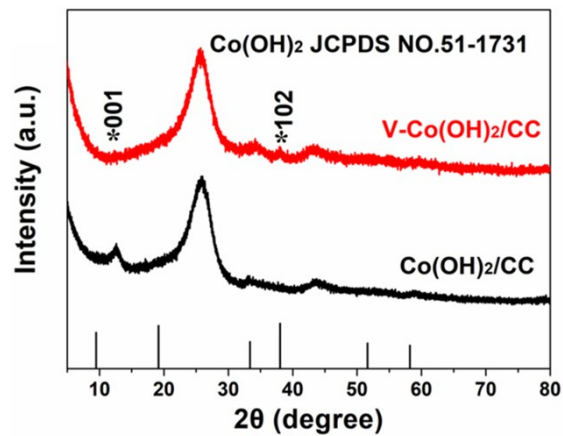

Figure S3 XRD pattern of V-doped  $\text{Co}(\text{OH})_2$  (LDH).

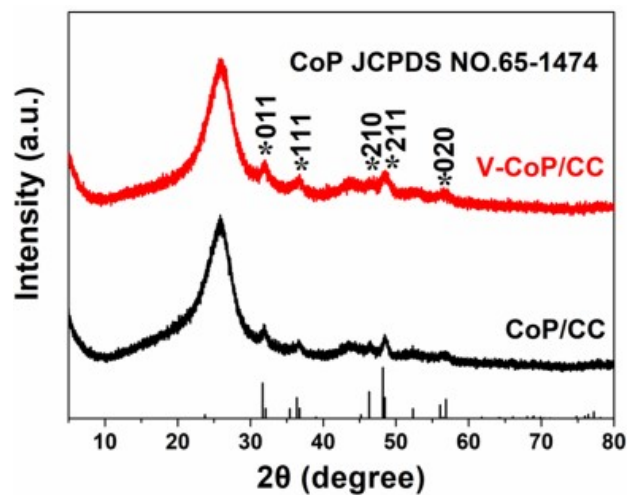

Figure S4 XRD patterns of V-CoP/CC.

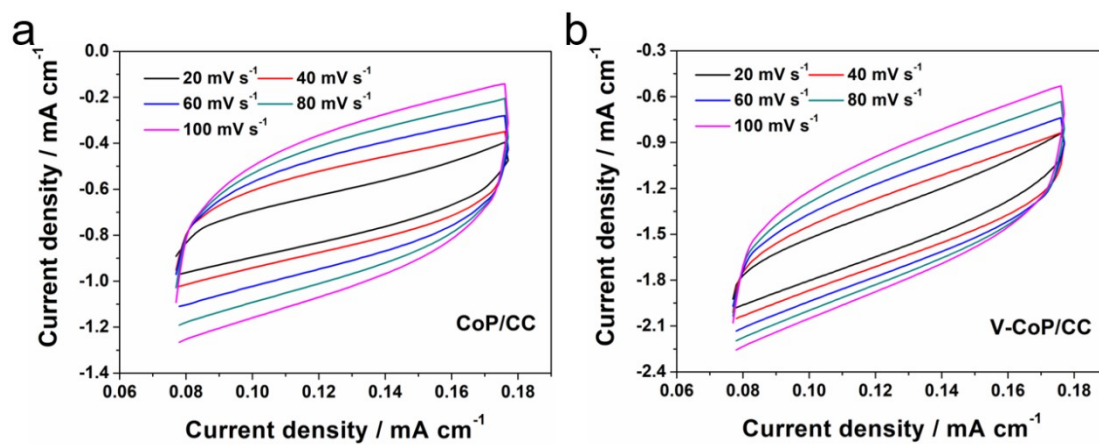

Figure S5 Cyclic voltammetry of a) CoP/CC and b) V-CoP/CC.

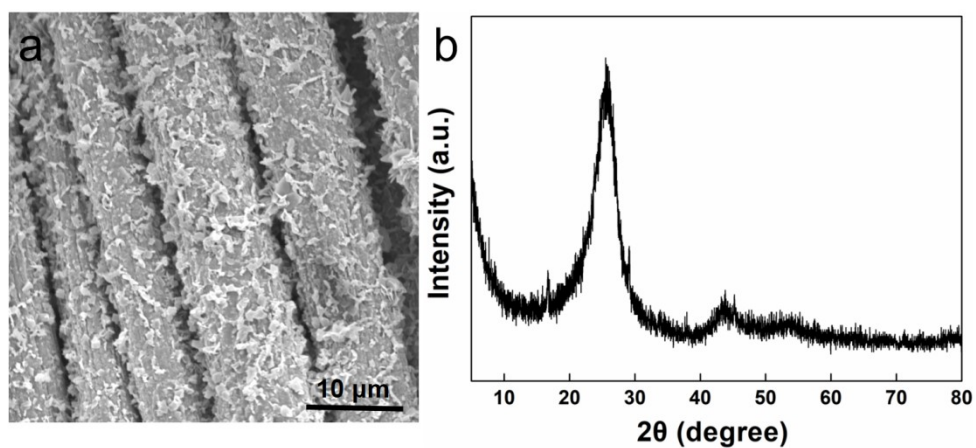

Figure S6 (a) SEM and (b) XRD patterns for V-CoP/CC after HER test.

Table S1. HER performances comparison of recently reported representative electrocatalysts in alkaline medium (1.0 M KOH, at 10 mA cm<sup>-2</sup>)

| <b>catalysts</b>                                   | <b>Overpotential<br/>(mV)</b> | <b>Reference</b> |
|----------------------------------------------------|-------------------------------|------------------|
| <b>V-CoP/CC</b>                                    | 98                            | This work        |
| <b>Co@NC-CNTs@NiFe-LDH</b>                         | 160                           | 1                |
| <b>Co@HMNC</b>                                     | 51                            | 2                |
| <b>Fe-Co<sub>1.11</sub>Te<sub>2</sub>@NCNTF</b>    | 165                           | 3                |
| <b>CoP/Ni<sub>2</sub>P@Co(OH)<sub>2</sub></b>      | 38                            | 4                |
| <b>Co(OH)<sub>2</sub>/MoS<sub>2</sub>/CC</b>       | 101                           | 5                |
| <b>Co<sub>3</sub>O<sub>4</sub>-Mo<sub>2</sub>N</b> | 212                           | 6                |
| <b>Ru/Co<sub>3</sub>O<sub>4</sub></b>              | 31                            | 7                |
| <b>CoSe/Co(OH)<sub>2</sub>-CM (AE)</b>             | 207                           | 8                |
| <b>CoP/CeO<sub>x</sub></b>                         | 118                           | 9                |
| <b>CeO<sub>2</sub>-NiCoP<sub>x</sub>/NCF</b>       | 39                            | 10               |

## References

- 1 L. Yan, Z. Y. Xu, X. N. Liu, S. Mahmood, J. L. Shen, J. Q. Ning, S. Li, Y. J. Zhong and Y. Hu, *Chem. Eng. J.*, 2022, **446**, 137049.
- 2 H. Y. Wang, Y. K. Jiao, S. J. Wang, P. C. Ye, J. Q. Ning, Y. J. Zhong and Y. Hu, *Small*, 2021, **17**, 2103517.
- 3 B. He, X. C. Wang, L. X. Xia, Y. Q. Guo, Y. W. Tang, Y. Zhao, Q. L. Hao, T. Yu, H. K. Liu and Z. Su, *ChemSusChem*, 2020, **13**, 5239-5247.
- 4 M. H. Xing, H. B. Liu, X. B. Dong, Z. H. Liang, S. Q. Huang, X. Ding, L. Yang, Z. P. Liu, S. T. Wang and D. P. Cao, *Mater. Today Energy.*, 2022, **30**, 101142.
- 5 X. L. Liu, X. S. Lv, P. Wang, Q. Q. Zhang, B. B. Huang, Z. Y. Wang, Y. Y. Liu, Z. K. Zheng and Y. Dai, *Electrochim. Acta.*, 2019, **229**, 618-625.
- 6 T. T. Wang, P. Y. Wang, W. J. Zang, X. Li, D. Chen, Z. K. Kou, S. C. Mu and J. Wang, *Adv. Funct. Mater.*, 2022, **32**, 2107382.
- 7 Z. Liu, L. L. Zeng, J. Y. Yu, L. J. Yang, J. Zhang, X. L. Zhang, F. Han, L. L. Zhao, X. Li, H. Liu and W. J. Zhou, *Nano Energy*, 2021, **85**, 105940.
- 8 C. Gong, W. X. Li, Y. N. Lei, X. He, H. Chen, X. Du, W. Fang, D. H. Wang and L. Zhao, *Compos. B. Eng.*, 2022, **236**, 109823.
- 9 X. Z. Song, W. Y. Zhu, J. C. Ni, Y. H. Zhao, T. Zhang, Z. Q. Tan, L. Z. Liu and X. F. Wang, *ACS Appl. Mater. Interfaces.*, 2022, **14**, 33151-33160.
- 10 S. T. Wen, J. Huang, T. T. Li, W. Chen, G. L. Chen, Q. Zhang, X. H. Zhang, Q. Y. Qian and K. Ostrikov, *Appl. Catal. B Environ.*, 2022, **316**, 121678.
